# Supplementary material for: Radiation-driven lipid accumulation and dendritic cell dysfunction in cancer
Source: PubMed Central journal article supplement (PMC4413852; doi:10.1038/srep09613), 2015-04-29
Supplement: srep09613-s1.pdf [file srep09613-s1.pdf]

# **Radiation-driven lipid lipid Accumulation and dendritic cell dysfunction in cancer**

Fu Gao<sup>1#</sup>, Cong Liu<sup>1#</sup>, Jiaming Guo<sup>1#</sup>, Weimin Sun<sup>2</sup>, Linfeng Xian<sup>1</sup>, Dongchen Bai<sup>1</sup>, Hu Liu<sup>1</sup>, Ying Cheng<sup>1</sup>, Bailong Li<sup>1</sup>, Jianguo Cui<sup>1</sup>, Chaoxiong Zhang<sup>3\*</sup>, Jianming Cai<sup>1\*</sup>

<sup>1</sup>Department of Radiation Medicine, Faculty of Naval Medicine, Second Military Medical University, Shanghai 200433, PR China;

<sup>2</sup>National Key Laboratory of Medical Immunology& Institute of Immunology, Second Military Medical University, Shanghai 200433, China

<sup>3</sup>Department of Centre for Disease Prevention and Control, Chengdu Military Region, Chengdu610021, China

#These authors contributed equally to this paper.

\*Correspondence: Chaoxiong Zhang & Jianming Cai. Address:

Department of Centre for Disease Prevention and Control, Chengdu Military Region, 12, Tianxian Road 610021, Chengdu; P.R. China Fax: +86-028-82871362. E-mail: zcx7792@126.com (Chaoxiong Zhang)

Department of Radiation Medicine, Second Military Medical University; 800, Xiangyin Road 200433, Shanghai; P.R. China Fax: +86-21-81871149. E-mail: caijianming882003@163.com (Jianming Cai).

Supplementary Table 1 Primers used

|                 |                                 |
|-----------------|---------------------------------|
| Ia F            | GTGGTGCTGATGGTGCTG              |
| Ia R            | CCATGAACTGGTACACGAAATG          |
| CD80 F          | GGCAAGGCAGCAATACCTTA            |
| CD80 R          | CTCTTTGTGCTGCTGATTCTG           |
| CD83 F          | CCAGCCGCATGTCGCA                |
| CD83 R          | CGAGCTGCAGATGGTAGTGT            |
| CD86 F          | TCTCCACGGAAACAGCATCT            |
| CD86 R          | CTTACGGAAGCACCCATGAT            |
| CCR7 F          | GAGGAAAAGGATGTCTGCCACG          |
| CCR7 R          | GGCTCTCCTTGTCAATTTCCAG          |
| CD40 F          | CTGTTTGCCATCCTCTTGGT            |
| CD40 R          | CGACTCTCTTTGCCATCCTC            |
| CD11c F         | CTGGATAGCCTTTCTTCTGCTG          |
| CD11c R         | GCACACTGTGTCCGAACTC             |
| IL-6 F          | CCGGAGAGGAGACTTCACAG            |
| IL-6 R          | GGAAATTGGGGTAGGAAGGA            |
| IFN- $\gamma$ F | TGACCAGAGCATCCAAAAGA            |
| IFN- $\gamma$ R | CTCTTCGACCTCGAAACAGC            |
| TNF- $\alpha$ F | TACTGAACTTCGGGGTGATTGGTC        |
| TNF- $\alpha$ R | CAGCCTTGTCCTTGAAGAGAACC         |
| TGF- $\beta$ F  | CACCGGAGAGCCCTGGATA             |
| TGF- $\beta$ R  | TGTACAGCTGCCGCACACA             |
| IL-1 $\beta$ F  | AAA TGC CTC GTG CTG TCT GAC C   |
| IL-1 $\beta$ R  | CTG CTT GAG AGG TGC TGA TGT ACC |
| IL-12 F         | CCACTCACATCTGCTGCTCCACAAG       |
| IL-12 R         | ACTTCTCATAGTCCCTTTGGTCCAG       |
| LPL F           | AGGCATACAGGTGCAACTCC            |
| LPL R           | TGTCCAGTGTGAGCCAGACT            |
| FABP4 F         | ACTGGGCCAGGAATTTGACG            |
| FABP4 R         | CTCGTGGAAGTGACGCCTT             |
